# Supplementary material for: Mpp10 represents a platform for the interaction of multiple factors within the 90S pre-ribosome
Source: PubMed Central journal article supplement (PMC5558966; doi:10.1371/journal.pone.0183272), 2017-08-16
Supplement: pone.0183272.s004.pdf [file pone.0183272.s004.pdf]

**Table S1. Plasmids used in this Study**

| <b>Plasmid</b>                                                 | <b>Relevant information</b>                                     | <b>Source</b>         |
|----------------------------------------------------------------|-----------------------------------------------------------------|-----------------------|
| pVA3-1                                                         | 2 $\mu$ , TRP1, GAL4 BD-murine p53 (72-390aa), pGBT9            | Takara Bio Inc.       |
| pTD1-1                                                         | 2 $\mu$ , LEU2, GAL4 AD-SV40 large T-antigen (84-708aa), pACT2  | Takara Bio Inc.       |
| pFA6A-natNT2                                                   | for genomic deletion disruption                                 | Janke et al., 2004    |
| pFA6a-FTpA-natNT2                                              | Flag-TEV-ProtA,TADH1, for genomic C-terminal tagging            | Thoms et al., 2015    |
| pFA6a-3HA-Trp1                                                 | HA,TADH1, for genomic C-terminal tagging                        | Longtine et al., 1998 |
| pGADT7- <i>ctMpp10</i>                                         | CEN, LEU2, PADH1, TADH1, N-terminal G4AD                        | Baßler et al., 2017   |
| pGADT7- <i>ctImp4</i>                                          | CEN, LEU2, PADH1, TADH1, N-terminal G4AD                        | Baßler et al., 2017   |
| pGADT7- <i>ctImp3</i>                                          | CEN, LEU2, PADH1, TADH1, N-terminal G4AD                        | Baßler et al., 2017   |
| pGADT7- <i>ctUtp3</i>                                          | CEN, LEU2, PADH1, TADH1, N-terminal G4AD                        | Baßler et al., 2017   |
| pGADT7- <i>ctRps5</i>                                          | CEN, LEU2, PADH1, TADH1, N-terminal G4AD                        | This study            |
| pGBKT7- <i>ctMpp10</i>                                         | CEN, TRP1, PADH1, TADH1, N-terminal G4BD                        | Baßler et al., 2017   |
| pGBKT7- <i>ctImp4</i>                                          | CEN, TRP1, PADH1, TADH1, N-terminal G4BD                        | Baßler et al., 2017   |
| pGBKT7- <i>ctImp3</i>                                          | CEN, TRP1, PADH1, TADH1, N-terminal G4BD                        | Baßler et al., 2017   |
| pGBKT7- <i>ctUtp3</i>                                          | CEN, TRP1, PADH1, TADH1, N-terminal G4BD                        | Baßler et al., 2017   |
| pGBKT7- <i>ctRps5</i>                                          | CEN, TRP1, PADH1, TADH1, N-terminal G4BD                        | This study            |
| YEplac181-P2 <i>ctRps5</i> p.Gal1-10-P1-pA TEV- <i>ctMpp10</i> | 2 $\mu$ , LEU, for GAL co-expression in yeast, PGAL1-10, TADH1  | This study            |
| YEplac112-P2 <i>ctImp4</i> p.Gal1-10-P1-FLAG- <i>ctImp3</i>    | 2 $\mu$ , TRP1, for GAL co-expression in yeast, PGAL1-10, TADH1 | This study            |
| YEplac195-P2 empty p.Gal1-10-P1-2HA- <i>ctUtp3</i>             | 2 $\mu$ , URA, for GAL co-expression in yeast, PGAL1-10, TADH1  | This study            |
| YEplac195-P2 empty p.Gal1-10-P1- <i>ctUtp3</i>                 | 2 $\mu$ , URA, for GAL co-expression in yeast, PGAL1-10, TADH1  | This study            |
| pGADT7- <i>ctMpp10</i> (1-162)                                 | CEN, LEU2, PADH1, TADH1, N-terminal G4AD                        | This study            |
| pGADT7- <i>ctMpp10</i> (184-467)                               | CEN, LEU2, PADH1, TADH1, N-terminal G4AD                        | This study            |
| pGADT7- <i>ctMpp10</i> (468-601)                               | CEN, LEU2, PADH1, TADH1, N-terminal G4AD                        | This study            |
| pGADT7- <i>ctMpp10</i> (602-785)                               | CEN, LEU2, PADH1, TADH1, N-terminal G4AD                        | This study            |
| pET24d-GST-TEV- <i>ctMpp10</i> (59-90)                         | Kan <sup>r</sup> , T7 promoter, lac operator                    | This study            |
| pET24d-GST-TEV- <i>ctMpp10</i> (125-157)                       | Kan <sup>r</sup> , T7 promoter, lac operator                    | This study            |

|                                                                          |                                                          |                   |
|--------------------------------------------------------------------------|----------------------------------------------------------|-------------------|
| pET24d-GST-TEV                                                           | Kan <sup>r</sup> , T7 promoter, lac operator             | Thoms et al, 2015 |
| pET15b-His- <i>ctUtp3</i>                                                | Amp <sup>r</sup> , T7 promoter, lac operator             | This study        |
| YEplac181-P2 <i>ctRps5</i> p.Gal1-10-P1- pA TEV- <i>ctMpp10</i> Δ59-90   | 2μ, LEU, for GAL co-expression in yeast, PGAL1-10, TADH1 | This study        |
| YEplac181-P2 <i>ctRps5</i> p.Gal1-10-P1- pA TEV- <i>ctMpp10</i> Δ125-157 | 2μ, LEU, for GAL co-expression in yeast, PGAL1-10, TADH1 | This study        |
| YEplac181-P2 <i>ctRps5</i> p.Gal1-10-P1- pA TEV- <i>ctMpp10</i> Δ59-157  | 2μ, LEU, for GAL co-expression in yeast, PGAL1-10, TADH1 | This study        |
| pet15b-His- <i>ctRps5</i>                                                | Amp <sup>r</sup> , T7 promoter, lac operator             | This study        |
| pET24d-GST-TEV- <i>ctMpp10</i> (283-332)                                 | Kan <sup>r</sup> , T7 promoter, lac operator             | This study        |
| pET24d-GST-TEV- <i>ctMpp10</i> (283-410)                                 | Kan <sup>r</sup> , T7 promoter, lac operator             | This study        |
| YEplac181-P2 <i>ctRps5</i> p.Gal1-10-P1- pA TEV- <i>ctMpp10</i> Δ283-330 | 2μ, LEU, for GAL co-expression in yeast, PGAL1-10, TADH1 | This study        |
| p416 pTEF <i>scMpp10</i>                                                 | CEN, URA, PTEF, TCYC1                                    | This study        |
| p413 pTEF                                                                | CEN, HIS, PTEF, TCYC1                                    | ATCC® 87362™      |
| p413 pTEF <i>scMpp10</i>                                                 | CEN, HIS, PTEF, TCYC1                                    | This study        |
| p413 pTEF <i>scMpp10</i> 96-593                                          | CEN, HIS, PTEF, TCYC1                                    | This study        |
| p413 pTEF <i>scMpp10</i> Δ178-248                                        | CEN, HIS, PTEF, TCYC1                                    | This study        |
| p413 pTEF <i>ScMpp10</i> Δ299-375                                        | CEN, HIS, PTEF, TCYC1                                    | This study        |
| p413 pTEF <i>scMpp10</i> Δ428-448                                        | CEN, HIS, PTEF, TCYC1                                    | This study        |
| p413 pTEF <i>scMpp10</i> Δ96-287                                         | CEN, HIS, PTEF, TCYC1                                    | This study        |
