# Supplementary material for: Mpp10 represents a platform for the interaction of multiple factors within the 90S pre-ribosome
Source: PubMed Central journal article supplement (PMC5558966; doi:10.1371/journal.pone.0183272), 2017-08-16
Supplement: pone.0183272.s005.pdf [file pone.0183272.s005.pdf]

**Table S2. Yeast strains used in this study**

| <b>Plasmid</b>       | <b>Relevant information</b>                                                                                          | <b>Source</b>                 |
|----------------------|----------------------------------------------------------------------------------------------------------------------|-------------------------------|
| W303                 | <i>wild type</i>                                                                                                     | Thomas and Rothstein,<br>1989 |
| Imp4-FTpA            | <i>W303, Mata, IMP4-FLAG-TEV-ProteinA::natNT2</i>                                                                    | This study                    |
| PJ69-4A              | <i>MATa, trp1-901, leu2-3,112, ura3-52, his3-200, gal4Δ, gal80Δ,<br/>LYS2::GAL1-HIS3, GAL2-ADE2, met2::GAL7-lacZ</i> | James et al., 1996            |
| Mpp10 shuffle strain | <i>W303, Mata, mpp10::His3MX6, p416 pTEF -MPP10</i>                                                                  | This study                    |
