# Supplementary material for: Mpp10 represents a platform for the interaction of multiple factors within the 90S pre-ribosome
Source: PubMed Central journal article supplement (PMC5558966; doi:10.1371/journal.pone.0183272), 2017-08-16
Supplement: pone.0183272.s006.pdf [file pone.0183272.s006.pdf]

**Table S3: Data collection and refinement statistics.**

|                                   | <i>ctImp4-ctMpp10</i>   |
|-----------------------------------|-------------------------|
| <b>Data collection</b>            |                         |
| Wavelength (Å)                    | 0.87260                 |
| Space group                       | <i>P6<sub>4</sub></i>   |
| Cell dimensions                   |                         |
| a, b, c (Å)                       | 112.88, 112.88, 44.00   |
| $\alpha$ , $\beta$ , $\gamma$ (°) | 90, 90, 120             |
| Resolution (Å)                    | 48.88-1.88 (1.95-1.88)* |
| $R_{\text{pim}}$                  | 0.052 (0.557)           |
| $I/\sigma(I)$                     | 9.15 (1.47)             |
| CC1/2                             | 0.997 (0.47)            |
| Reflections total                 | 181956 (17813)          |
| Reflections unique                | 26155 (2516)            |
| Completeness (%)                  | 99.68 (96.88)           |
| Multiplicity                      | 7.0 (6.9)               |
| <b>Refinement</b>                 |                         |
| $R_{\text{work}}$                 | 0.1836 (0.3101)         |
| $R_{\text{free}}$                 | 0.2192 (0.3501)         |
| No. atoms                         |                         |
| Protein                           | 2252                    |
| Water                             | 136                     |
| Ligands                           | 4                       |
| B-factors                         |                         |
| Protein                           | 34.81                   |
| Water                             | 40.36                   |
| Ligands                           | 47.38                   |
| R.m.s deviations                  |                         |
| Bond lengths (Å)                  | 0.009                   |
| Bond angles (°)                   | 0.95                    |
| Ramachandran plot                 |                         |
| Most favoured (%)                 | 97.09                   |
| Disallowed (%)                    | 0.00                    |

\* Values in parenthesis refer to the highest resolution shell.
